# Supplementary material
Source: PubMed Central journal article supplement (PMC3081206)
Supplement: mmc1.pdf [file mmc1.pdf]

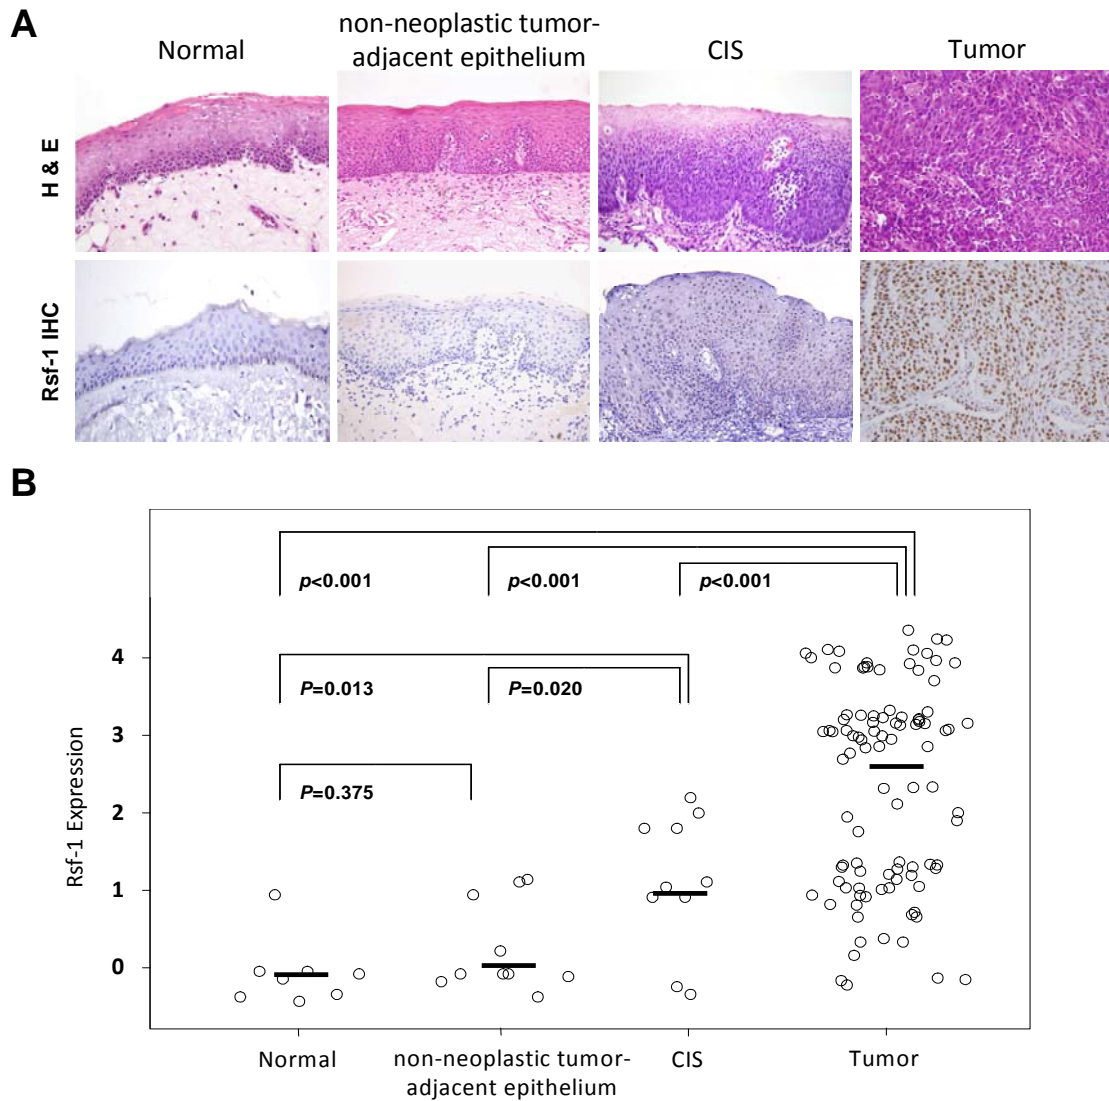

**Supplementary Figure 1.** Immunoreactivity of anti-Rsf-1 in oral squamous tissues and carcinoma. **A:** immunoreactivity was weak or undetectable in normal control and non-neoplastic tumor-adjacent epithelial cells. **B:** A stepwise and significant increment of Rsf-1 expression in non-neoplastic epithelium, CIS, and tumor cells could also be discerned.
